# Supplementary material
Source: publisher site journal article supplement (https://www.dovepress.com/article/338824)
Supplement: Supplementary file 1 [file get_supplementary_file.php]

**Obstructive sleep apnea is associated with an increased prevalence of polycythemia in patients with chronic obstructive pulmonary disease**

Zhaofu Zeng1; Yan Song1; Xin He1; Haizhen Yang1; Fang Yue1; Mengqing Xiong1; Ke Hu1

1Department of Respiratory and Critical Care Medicine, Renmin Hospital of Wuhan University, Wuhan, China

Correspondence: Ke Hu, Department of Respiratory and Critical Care Medicine, Renmin Hospital of Wuhan University, Wuhan 430060, China. Tel +1897 103 5988; E-mail: [huke-rmhospital@163.com](mailto:huke-rmhospital@163.com)


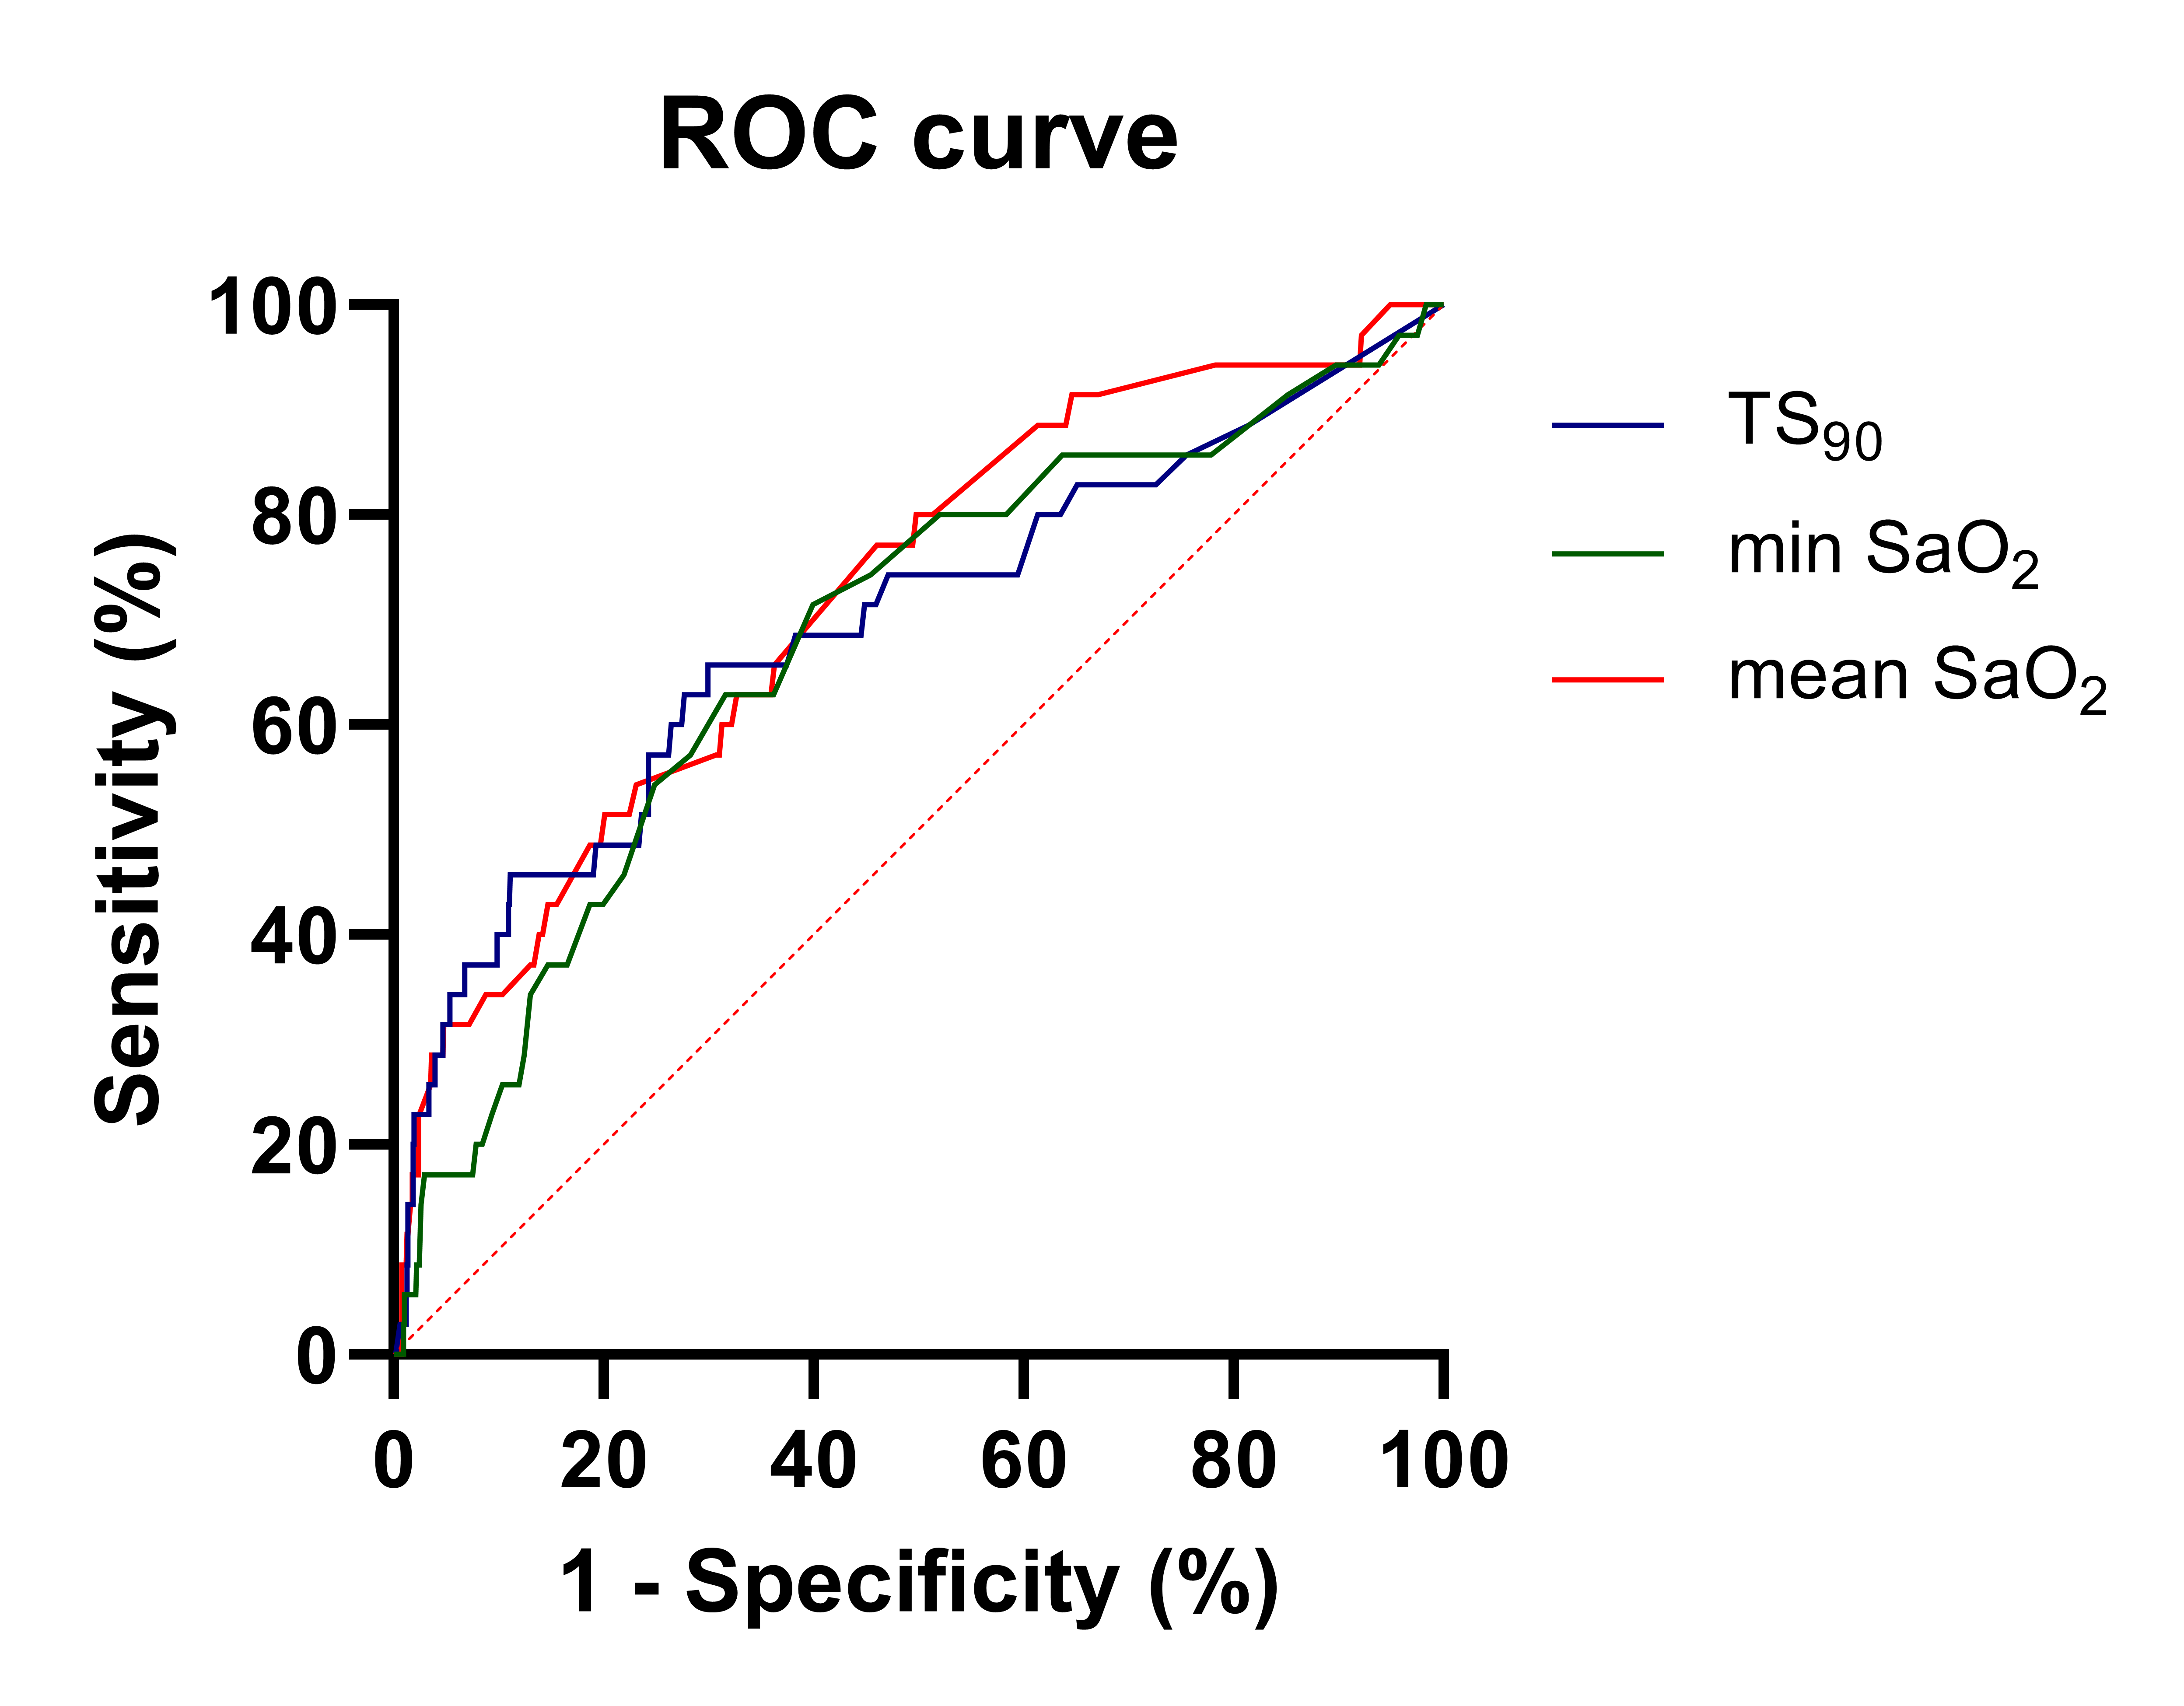


**Supplementary Figure 1.** ROC curves of TS90, min SaO2, and mean SaO2 for diagnosing polycythemia in COPD patients. The optimal threshold of TS90 for polycythemia was 7.75% (sensitivity = 0.657, specificity = 0.7), the optimal threshold of min SaO2 for polycythemia was 82.5% (sensitivity = 0.6, specificity = 0.714), and the optimal threshold of mean SaO2 for polycythemia was 91.45% (sensitivity = 0.799, specificity = 0.514).

**Supplementary Table 1.** The relationship between polycythemia and other comorbidities

| **Comorbidities** | **Univariate regression analysis** | | | **Multiple regression analysis** | | | |
| --- | --- | --- | --- | --- | --- | --- | --- |
|  | ***OR*** | **95% *Cl*** | ***p*** | **Adjusted *OR*** | **95%*Cl*** | | ***p*** |
| PH | 3.379 | 1.245-9.172 | 0.017 | 4.731 | | 1.462-15.306 | 0.009 |
| CHD | 1.063 | 0.456-2.477 | 0.887 | - | | - | - |
| Hypertension | 1.430 | 0.727-2.814 | 0.300 | - | | - | - |
| Stoke | 0.395 | 0.053-2.935 | 0.364 | - | | - | - |
| Diabetes | 0.773 | 0.232-2.576 | 0.676 | - | | - | - |

PH = Pulmonary hypertension; CHD = coronary heart disease. In multivariate logistic regression analysis,variables including sex, age, BMI, neck circumference, tobacco use, alcohol use, FEV1%, FEV1/FVC, the presence of venous thromboembolism, TS90, mean SaO2, min SaO2 and PTL were adjusted.
